# Supplementary material
Source: PubMed Central journal article supplement (PMC6016625)
Supplement: BPH-175-2881-s001.pdf [file BPH-175-2881-s001.pdf]

# ***In vitro* and *in vivo* characterisation of the bifunctional MOP/DOP ligand UFP-505.**

N. Diets<sup>1</sup>, H. Niwa<sup>1</sup>, R. Tose<sup>1</sup>, J McDonald<sup>1</sup>, V. Ruggieri<sup>2</sup>, M. Filaferrero<sup>3</sup>, G. Vitale<sup>4</sup>, L. Micheli<sup>5</sup>, C. Ghelardini<sup>5</sup>, S Salvadori<sup>6</sup>, G. Calo<sup>6</sup>, R. Guerrini<sup>7</sup>, D.J. Rowbotham<sup>8</sup> and D.G. Lambert<sup>1</sup>.

## **ONLINE SUPPLEMENT**

### **Materials and Additional Methodology**

#### **Sources of chemicals**

The opioid peptide UFP-505 was synthesised at the Department of Pharmaceutical Sciences at the University of Ferrara as described previously. <sup>A, B</sup> Naloxone (non-selective opioid antagonist) and [D-Pen<sup>2</sup>,D-Pen<sup>5</sup>]-enkephalin (DOP agonist; DPDPE) were purchased from Sigma. Tritiated diprenorphine (non-selective opioid receptor antagonist; <sup>3</sup>H-DPN; 50.9 Ci mmol<sup>-1</sup>) was purchased from Perkin Elmer. Endomorphin-1 (EM1) was synthesised in house (Department of Pharmaceutical Sciences, University of Ferrara). GTPγ<sup>35</sup>S (1250 Ci mmol<sup>-1</sup>) was purchased from Amersham Pharmacia Biotech (Buckinghamshire, UK). Morphine and Fentanyl were purchased from Sigma-Aldrich Co. (St. Louis, USA) and S.A.L.A.R.S. (Como, Italy). All tissue culture media and supplements were obtained from Invitrogen (GIBCO, Paisley, U.K.). The ketamine hydrochloride/xylazine hydrochloride solution was purchased by Sigma, USA. All other reagents used were purchased with the highest quality available.

#### **Membrane preparation**

Cells and tissues were homogenised and crude membrane pellets obtained following centrifugation at 13500 g for 3 min at 4 °C. These were then resuspended in a homogenising buffer containing 50 mM Tris-HCL pH to 7.4 with KOH (for saturation and displacement binding) or 50 mM Tris and 0.2 mM EGTA pH 7.4 with NaOH (for GTPγ<sup>35</sup>S binding in hMOP, hDOP), additionally supplemented with 5 mM MgSO<sub>4</sub> pH7.4 with KOH (for GTPγ<sup>35</sup>S on hNOP) as described previously.<sup>C</sup> Suspensions were centrifuged at 20374 g for 10 min at 4 °C. This was repeated three times in total. Pellets were finally resuspended in an appropriate volume of buffer and protein concentration was determined by the method of Lowry.<sup>D</sup>

#### **Opioid receptor mRNA expression**

RNA was extracted from animal tissue or cultured cells using a Cells-to-CT™ gene expression kit (Applied Biosystems). mRNA encoding the human MOP and DOP receptors was assessed by quantitative real-time PCR (qRT-PCR) using validated TaqMan primers and compared with a housekeeper (glyceraldehyde-3-phosphate dehydrogenase, GAPDH) as previously described<sup>E</sup> using a StepOne instrument (Applied Biosystems). q-PCR data were expressed as the difference in cycle threshold ( $\Delta C_t = C_t^{\text{Gene of interest}} - C_t^{\text{GAPDH}}$ ; high value, low expression).

**Dietis et al, Table 1S**

**Opioid receptor mRNA expression changes in neural tissue from treated rats**

| Tissue                   | Treatment       | OPRM1         | OPRK1          | OPRD1          | OPRL1          |
|--------------------------|-----------------|---------------|----------------|----------------|----------------|
| <b>Spinal cord</b>       | <i>Morphine</i> | 8.08 ± 0.13 ↑ | 10.89 ± 0.07   | 9.14 ± 0.07 ↑  | 12.34 ± 0.05 ↓ |
|                          | <i>UFP-505</i>  | 8.54 ± 0.32 ↑ | 11.13 ± 0.12   | 9.55 ± 0.50 ↑  | 12.27 ± 0.17 ↓ |
|                          | <i>Saline</i>   | 9.64 ± 0.15   | 10.87 ± 0.06   | 11.01 ± 0.24   | 9.80 ± 0.17    |
| <b>Frontal Cortex</b>    | <i>Morphine</i> | 9.16 ± 0.04   | 11.73 ± 0.48 ↑ | 10.82 ± 0.22   | 10.22 ± 0.11   |
|                          | <i>UFP-505</i>  | 9.73 ± 0.46   | 11.81 ± 1.13 ↑ | 11.13 ± 0.04   | 10.12 ± 0.15   |
|                          | <i>Saline</i>   | 10.77 ± 0.44  | 14.05 ± 0.04   | 11.10 ± 0.18   | 11.47 ± 0.15   |
| <b>Rest of the brain</b> | <i>Morphine</i> | 10.24 ± 0.11  | 12.44 ± 0.31   | 11.93 ± 0.09 ↓ | 9.38 ± 0.05    |
|                          | <i>UFP-505</i>  | 10.23 ± 0.01  | 12.29 ± 0.01   | 12.70 ± 0.01 ↓ | 9.34 ± 0.01    |
|                          | <i>Saline</i>   | 9.75 ± 0.18   | 11.09 ± 0.07   | 10.36 ± 0.16   | 9.42 ± 0.13    |

**Table 1S legend:** Opioid receptor mRNA levels ( $\Delta C_t$  values) for all opioid receptor genes (mean ± SEM; n=3-5) using GAPDH as a housekeeper, in neuronal tissue from acutely treated rats (A: 10nmol UFP-505, 10nmol morphine or saline-treated; i.t.). Data were produced by RT-qPCR from tissue lysates. Reduction in the  $\Delta C_t$  indicates upregulation (↑) of receptor mRNA, whereas increase in the  $\Delta C_t$  indicates downregulation (↓).

## Dietis et al, Supplementary Figure 1.

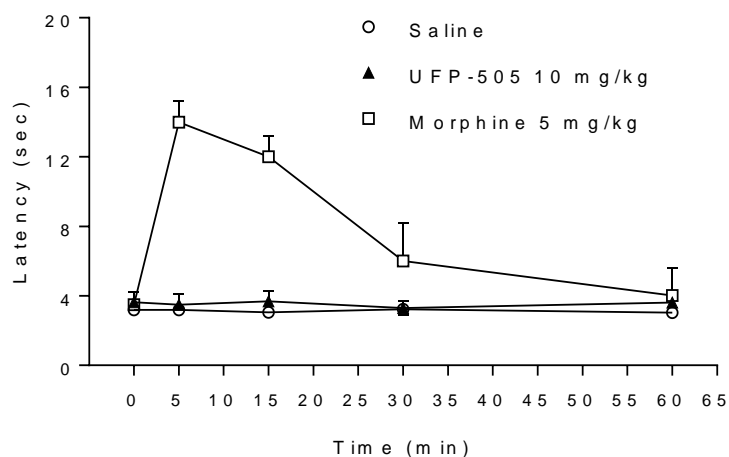

*Tail-withdrawal assay.* Morphine was dissolved in saline while UFP-505 was dissolved in 1% DMSO and 100  $\mu$ l/mouse was administered subcutaneously at 30 min before the test to CD1 male mice (25-30g). Antinociception was evaluated by tail-withdrawal assay in a water temperature of 48°C and cut off time 20 sec. Data are mean+SEM, 4 animals in each group.

### Supplement specific references

- A. Balboni G, Guerrini R, Salvadori S, et al. Evaluation of the Dmt-Tic pharmacophore: conversion of a potent delta-opioid receptor antagonist into a potent delta agonist and ligands with mixed properties. *J Med Chem* 2002; 45: 713-20
- B. Balboni G, Salvadori S, Trapella C, et al. Evolution of the Bifunctional Lead  $\mu$  Agonist /  $\delta$  Antagonist Containing the Dmt-Tic Opioid Pharmacophore. *ACS Chem Neurosci* 2010; 1: 155-64
- C. Kitayama M, Barnes TA, Carra G, et al. Pharmacological profile of the cyclic nociceptin/orphanin FQ analogues c[Cys10,14]N/OFQ(1-14)NH<sub>2</sub> and c[Nphe1,Cys10,14]N/OFQ(1-14)NH<sub>2</sub>. *Naunyn Schmiedeberg's Arch Pharmacol* 2003; 368: 528-37
- D. Lowry OH, Rosebrough NJ, Farr AL, Randall RJ. Protein measurement with the Folin phenol reagent. *J Biol Chem* 1951; 193: 265-75
- E. McDonald J, Leonard AD, Serrano-Gomez A, Young SP, Swanevelder J, Thompson JP, Lambert DG. Assessment of nociceptin/orphanin FQ and micro-opioid receptor mRNA in the human right atrium. *Br J Anaesth.* 2010 Jun;104(6):698-704.
